# Supplementary material
Source: PubMed Central journal article supplement (PMC7720778)
Supplement: NIHMS1648193-supplement-1.pdf [file NIHMS1648193-supplement-1.pdf]

| <b>Online Table 1. Source and catalog number of reagents.</b> |                           |                       |
|---------------------------------------------------------------|---------------------------|-----------------------|
| <b>Reagent</b>                                                | <b>Vendor</b>             | <b>Catalog Number</b> |
| Fast Green FCF                                                | Sigma                     | F7252-5G              |
| Direct Red 80                                                 | Sigma                     | 365548                |
| Alcian Blue solution (pH2.5)                                  | Sigma                     | B8438                 |
| Nuclear fast red solution                                     | Sigma                     | N8002                 |
| 3-aminopropionitrile fumarate salt (BAPN)                     | Sigma                     | A3134                 |
| porcine pancreas elastase                                     | Sigma                     | E1250                 |
| Van Gieson Elastic stain kit (Richard-Allan Scientific)       | Thermo Scientific         | 87017                 |
| Rabbit F4/80 monoclonal antibody                              | Cell Signaling Technology | #30325                |
| Mouse anti- $\alpha$ -smooth muscle actin monoclonal antibody | DAKO                      | M0851                 |
| Rabbit anti-NF- $\kappa$ B p65 monoclonal antibody            | Cell Signaling Technology | #8242                 |
| Rat anti-Mac2 monoclonal antibody                             | Cedarlane                 | CL8942AP              |
| Biotinylated goat anti-mouse IgG antibody                     | Vector Laboratories       | BA-9200               |
| Biotinylated goat anti-rabbit IgG antibody                    | Vector Laboratories       | BA-1000               |
| Goat anti-rabbit IgG Secondary Antibody, Alexa Fluor Plus 594 | Invitrogen                | # A32740              |
| Avidin-biotinylated enzyme complex                            | Vector Laboratories       | PK-6100               |
| DAB Peroxidase Substrate Kit                                  | Vector Laboratories       | SK-4100               |
| Serum-free blocking solution                                  | Dako                      | X0909                 |
| Antibody diluent                                              | Dako                      | S080983-2             |
| ProLong <sup>TM</sup> Gold Antifade Mountant                  | ThermoFisher Scientific   | P10144                |
| RPMI-1640 Medium                                              | Sigma                     | R8758                 |
| Gibco <sup>TM</sup> Fetal Bovine Serum                        | ThermoFisher Scientific   | 10437028              |
| Gibco <sup>TM</sup> Penicillin-Streptomycin-Glutamine         | ThermoFisher Scientific   | 10378016              |
| Recombinant murine TNF- $\alpha$                              | PeproTech                 | 315-01A               |
| RNeasy Mini Kit                                               | QIAGEN                    | 74104                 |
| iScript <sup>TM</sup> cDNA Synthesis Kit                      | BIO-RAD                   | 1708891               |
| iQ <sup>TM</sup> SYBR <sup>®</sup> Green Supermix             | BIO-RAD                   | 1708882               |
| Mouse IgG2a kappa Isotype Control                             | Invitrogen                | # 14-4724-82          |
| Rabbit IgG Isotype Control                                    | Invitrogen                | #02-6102              |
| Rat IgG2a isotype control                                     | Cedarlane                 | #CLCR2A00             |
| CyQUANT LDH Cytotoxicity Assay kit                            | Invitrogen                | C20300                |

**Online Table 2. Statistics**

| <b>Figures</b> | <b>Shapiro-Wilk normality test</b>                              | <b>Brown-Forsythe test</b> | <b>Test used (Graphpad prism 8)</b> |                                                           |
|----------------|-----------------------------------------------------------------|----------------------------|-------------------------------------|-----------------------------------------------------------|
| Figure 1       | Figure 1C Prevention-Maximal aortic width                       | Accept normality           | Reject constancy of variance        | Parametric: Welch ANOVA with Dunnett's T3 post-hoc test   |
|                | Figure 1D Prevention-Percentage increase of maxial aortic width | Accept normality           | Accept constancy of variance        | Parametric: unpaired Student's t-test                     |
|                | Figure 1E Prevention-Total aneurysmal area                      | Accept normality           | Reject constancy of variance        | Parametric: Welch ANOVA with Dunnett's T3 post-hoc test   |
| Figure 2       | Figure 2C Echo diastole internal diameter                       | Accept normality           | Accept constancy of variance        | Parametric: paired Student's t-test                       |
|                | Figure 2E Intervention-Maximal aortic width                     | Accept normality           | Accept constancy of variance        | Parametric: unpaired Student's t-test                     |
|                | Figure 2F Intervention-Total aneurysmal area                    | Accept normality           | Accept constancy of variance        | Parametric: unpaired Student's t-test                     |
| Figure 3       | Figure 3B Elastin content in media area                         | Accept normality           | Accept constancy of variance        | Parametric: one-way ANOVA with Holm-Sidak's post-hoc test |
|                | Figure 3D Media $\alpha$ -SMA intensity                         | Accept normality           | Accept constancy of variance        | Parametric: one-way ANOVA with Holm-Sidak's post-hoc test |
| Figure 4       | Figure 4C Proteoglycan content in media area                    | Accept normality           | Accept constancy of variance        | Parametric: one-way ANOVA with Holm-Sidak's post-hoc test |
| Figure 5       | Figure 5B F4/80 staining area                                   | Accept normality           | Accept constancy of variance        | Parametric: one-way ANOVA with Holm-Sidak's post-hoc test |
| Figure 6       | Figure 6B p65 nuclear translocation in macrophages              | Accept normality           | Reject constancy of variance        | Parametric: Welch ANOVA with Games-Howell post-hoc test   |
|                | Figure 6C TNF- $\alpha$ mRNA level in macrophages               | Accept normality           | Accept constancy of variance        | Parametric: one-way ANOVA with Holm-Sidak's post-hoc test |
|                | Figure 6D IL-1 $\beta$ mRNA level in macrophages                | Accept normality           | Accept constancy of variance        | Parametric: one-way ANOVA with Holm-Sidak's post-hoc test |
|                | Figure 6F p65 staining area                                     | Accept normality           | Accept constancy of variance        | Parametric: one-way ANOVA with Holm-Sidak's post-hoc test |
| Figure S11     | Figure S11 TNF- $\alpha$ mRNA level of infrarenal aortas        | Accept normality           | Reject constancy of variance        | Parametric: Welch's t-test                                |



# Supplementary Figure S1

**A**

Saline/Elastase

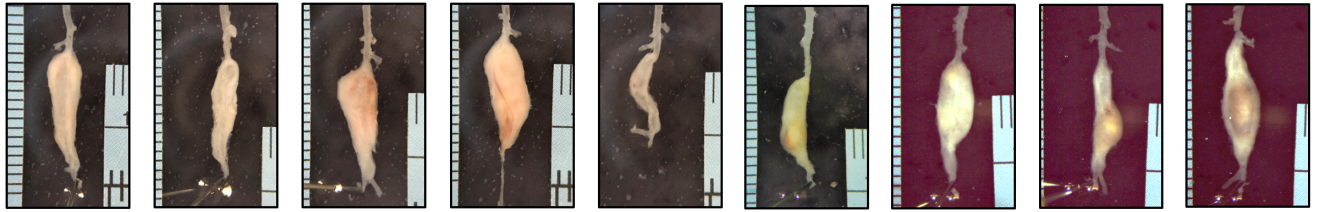

Mice # 1

# 2

# 3

# 4

# 5

# 6

# 7

# 8

# 9

**B**

Vinpocetine/Elastase

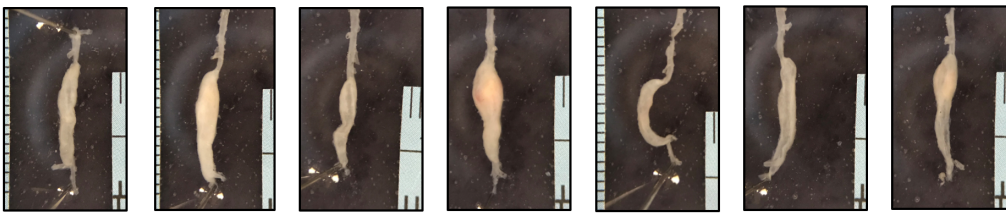

Mice # 1

# 2

# 3

# 4

# 5

# 6

# 7

**Supplementary Figure S1.** Microscopic images of abdominal aortas included for quantification for vinpocetine pretreatment model. A, Saline/elastase group. One animal died due to rupture at 10 days before harvest and was not shown here. B, Vinpocetine/elastase group. Mice #1-5 in the elastase/Saline group (A) and Mice #1-7 in the elastase/vinpocetine group (B) were included for histology and immunostaining analysis.

# Supplementary Figure S2

**A**

Saline/Elastase

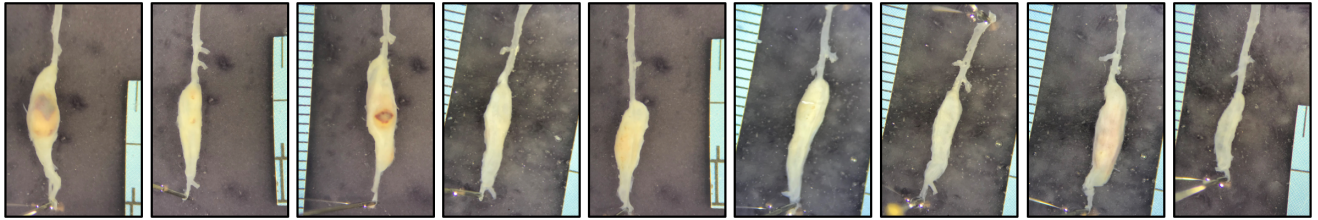

**B**

Vinpocetine/Elastase

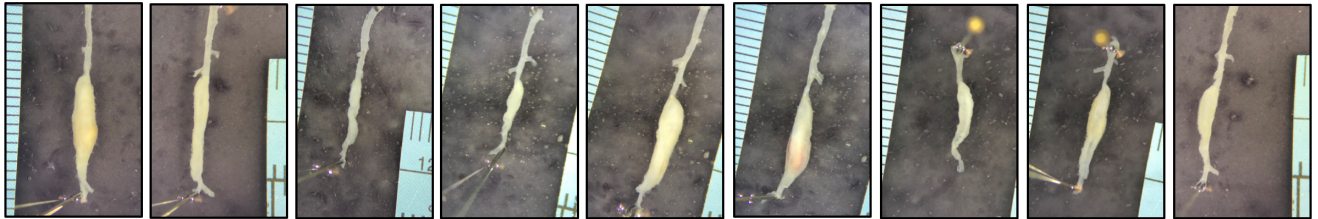

**Supplementary Figure S2.** Microscopic images of abdominal aortas included in quantification for the experimental post-intervention model. A, Saline/elastase group. B, Vinpocetine/elastase group.

# Supplementary Figure S3

## A Saline/Sham

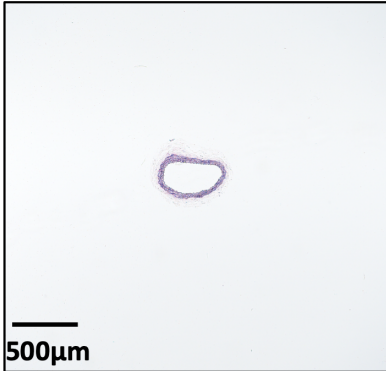

## C Saline/Elastase

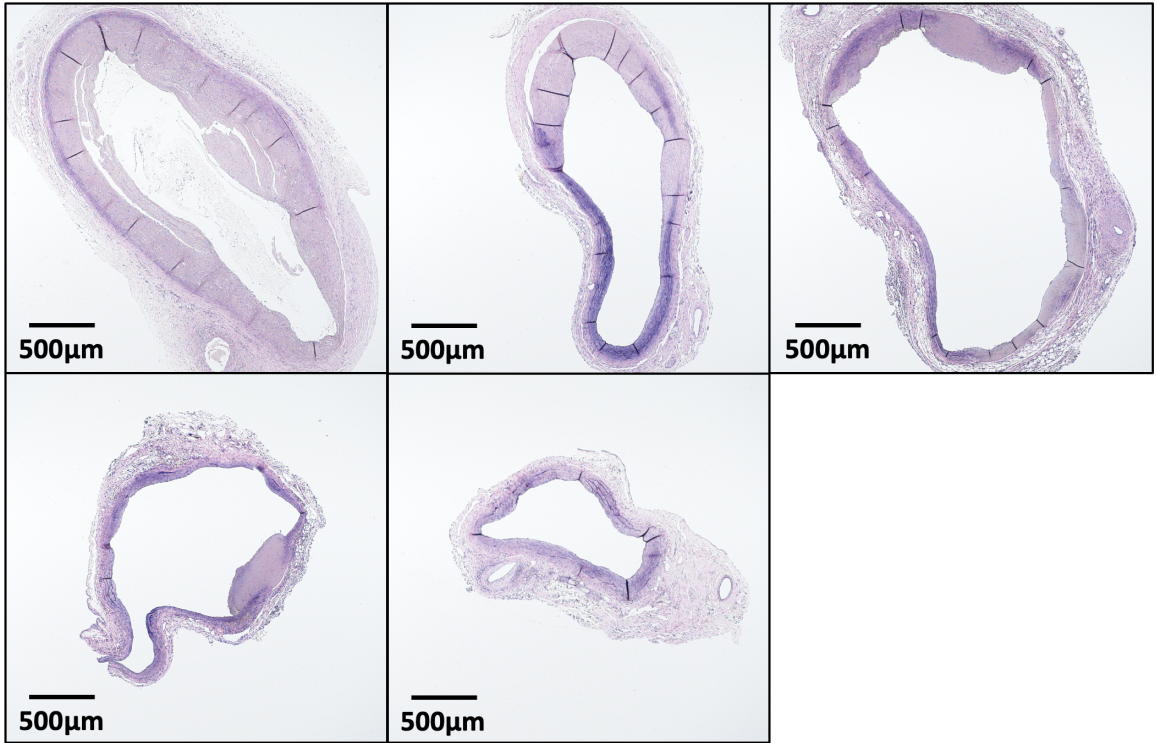

## B Vinpocetine/Sham

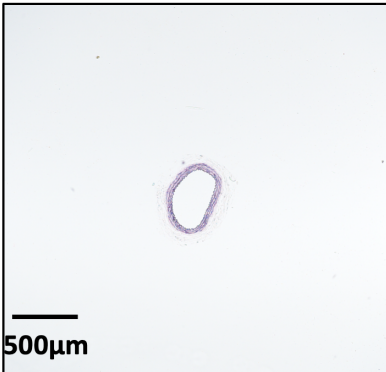

## D Vinpocetine/Elastase

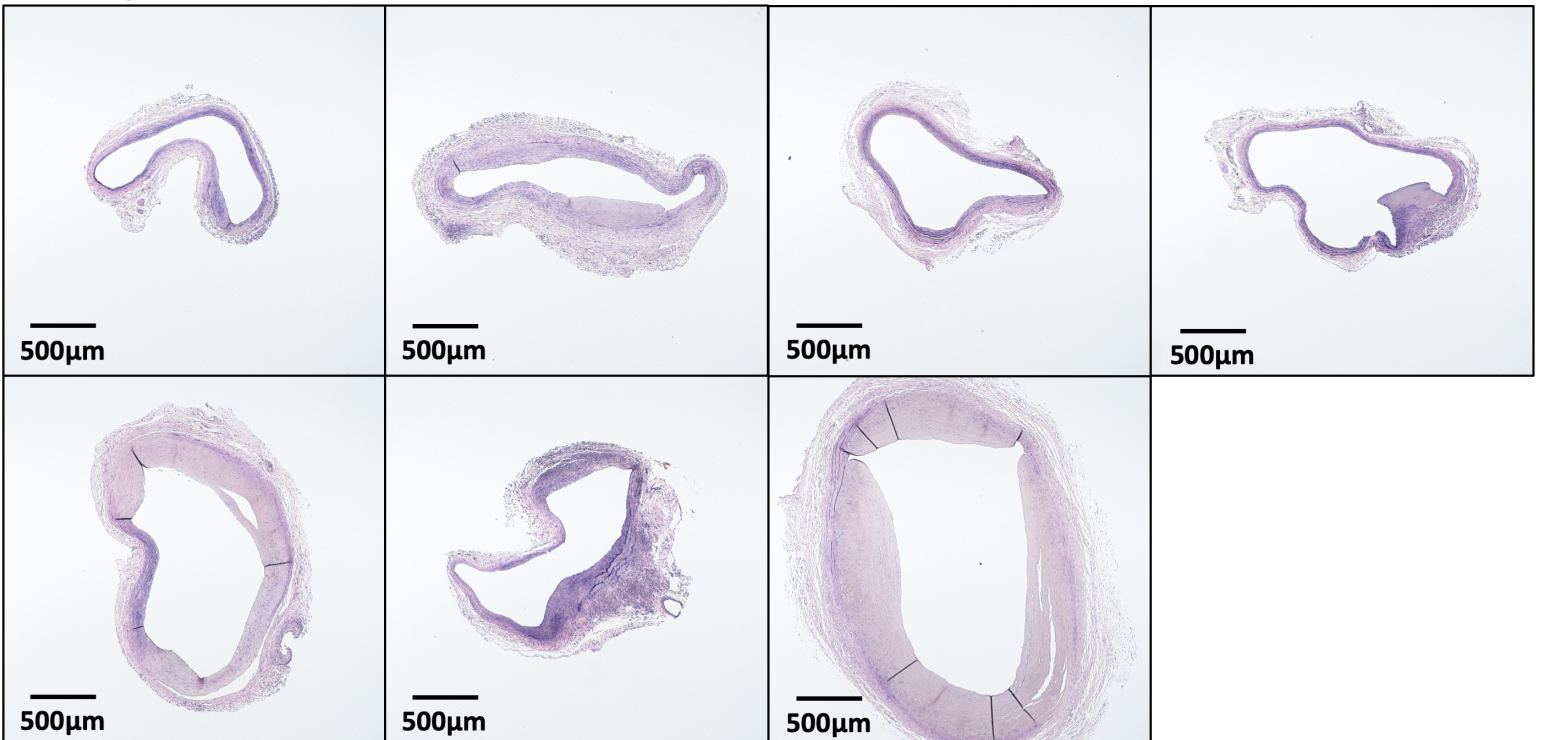

**Supplementary Figure S3.** Van Gieson staining of abdominal aorta cross sections. A, Saline/sham group. B, Vinpocetine/sham group. C, Saline/elastase group. D, Vinpocetine/elastase group. The section from the level of the largest diameter of AAA for each animal was selected for staining.



# Supplementary Figure S4

## A Saline/Sham

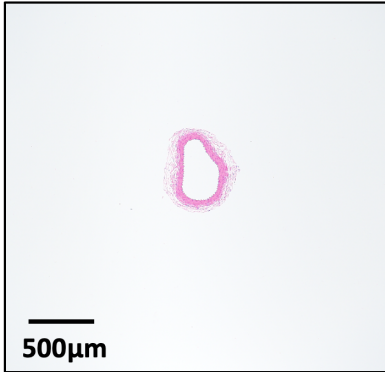

## C Saline/Elastase

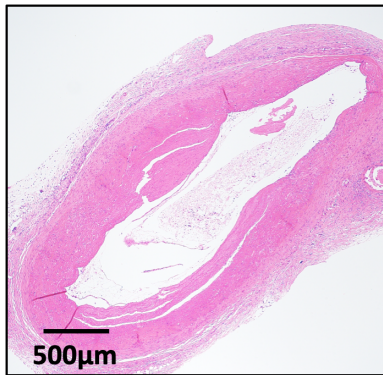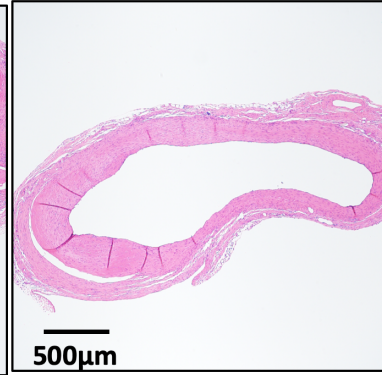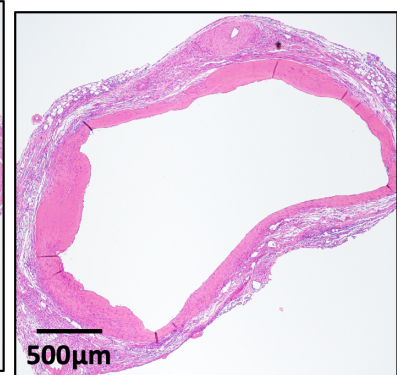

## B Vinpocetine/Sham

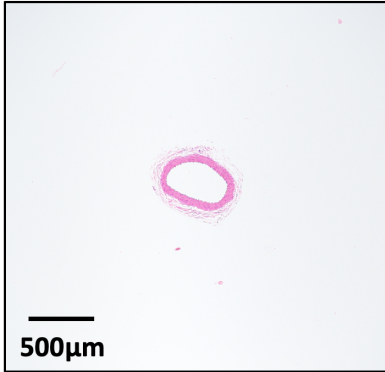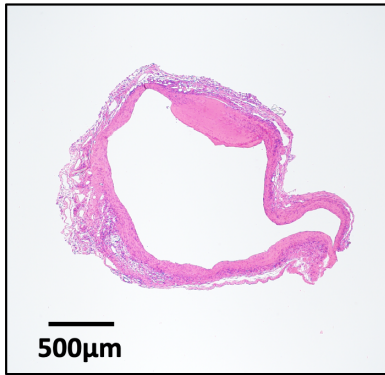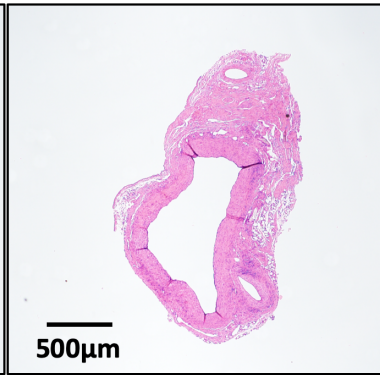

## D Vinpocetine/Elastase

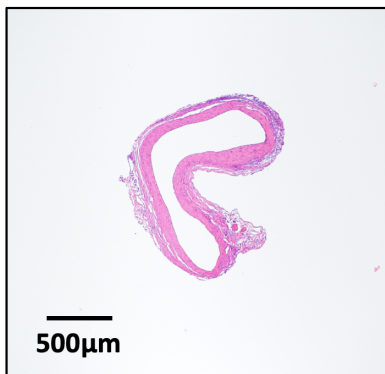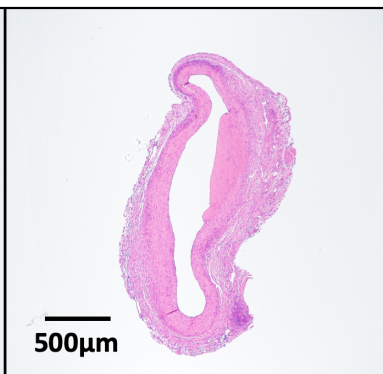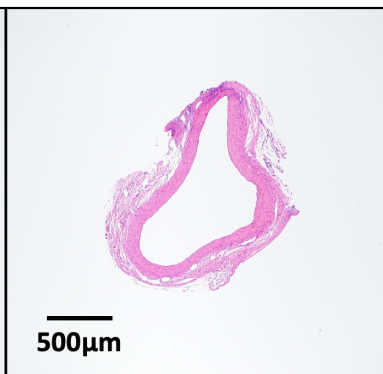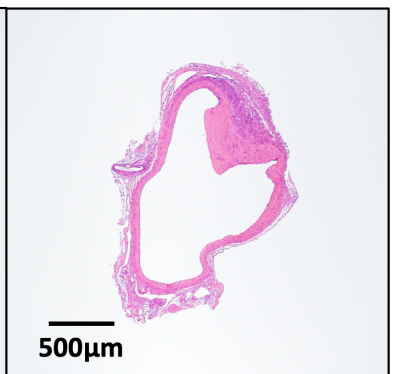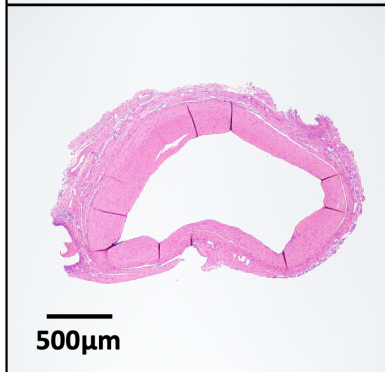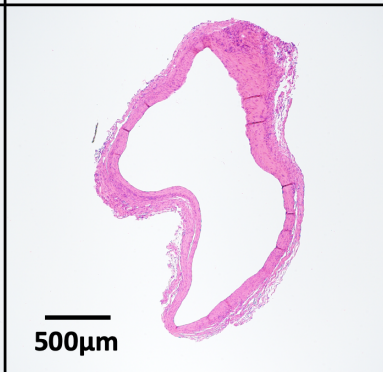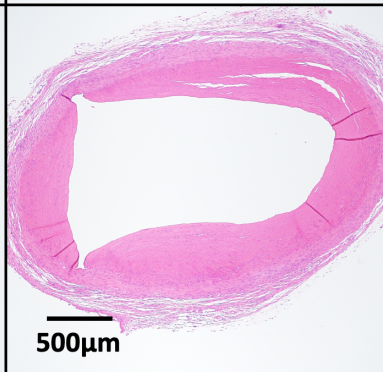

**Supplementary Figure S4.** Hematoxylin and eosin staining of abdominal aorta cross sections. A, Saline/sham group. B, Vinpocetine/sham group. C, Saline/elastase group. D, Vinpocetine/elastase group. The section from the level of the largest diameter of AAA for each animal was selected for staining.



# Supplementary Figure S5

## Negative control of $\alpha$ -SMA immunohistochemistry

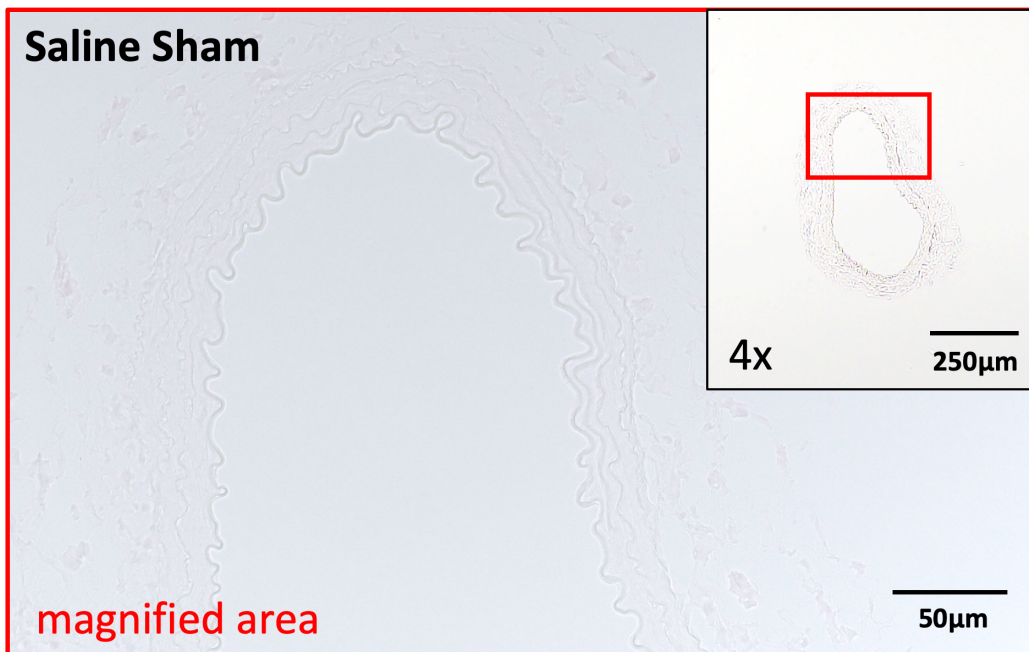

**Supplementary Figure S5.** Negative control of  $\alpha$ -SMA immunohistochemistry staining in adjacent section of saline sham used in Fig. 3C (upper left panel). The inset is the 4x image of the whole section. Image outlined red is the magnification of the area highlighted in red box in inset. Negative controls were imaged using same acquisition parameters as Fig. 3C.

# Supplementary Figure S6

## A Saline/Sham

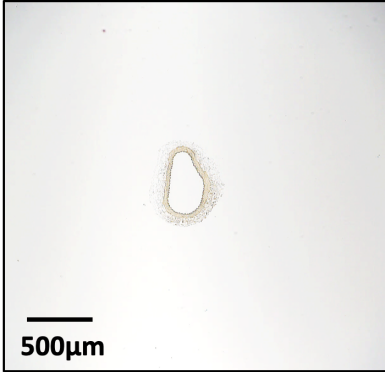

## B Vinpocetine/Sham

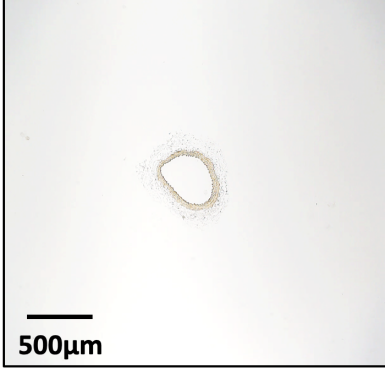

## C Saline/Elastase

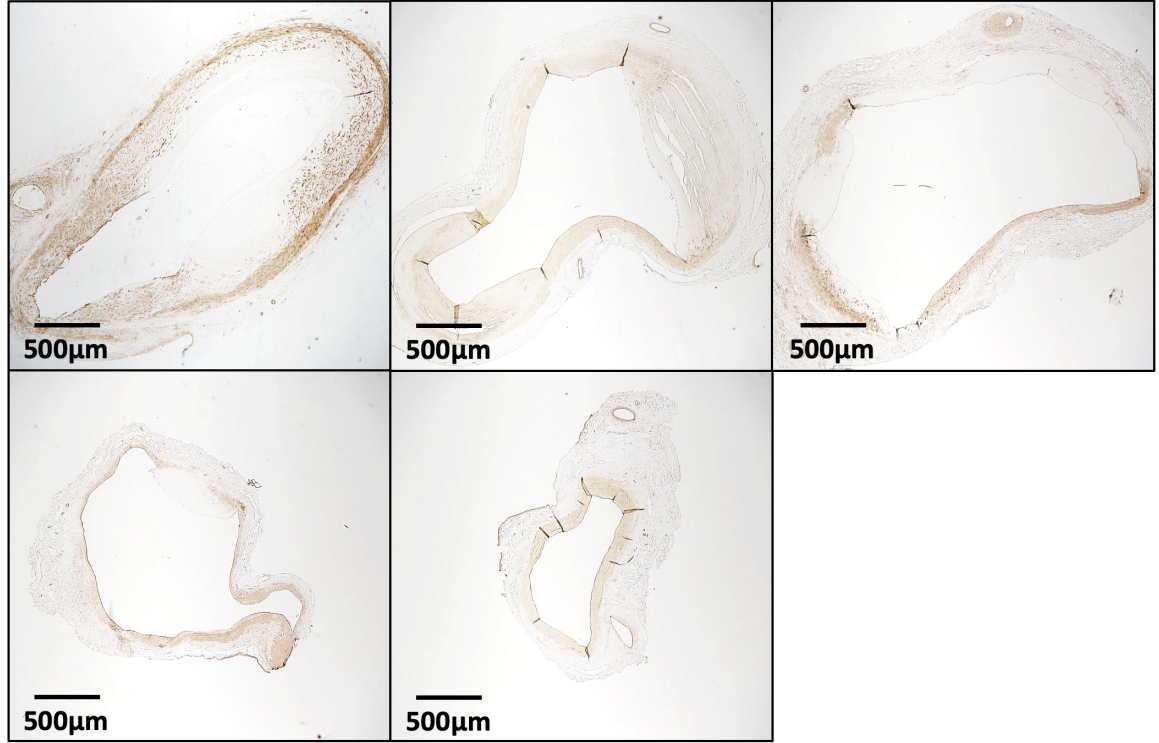

## D Vinpocetine/Elastase

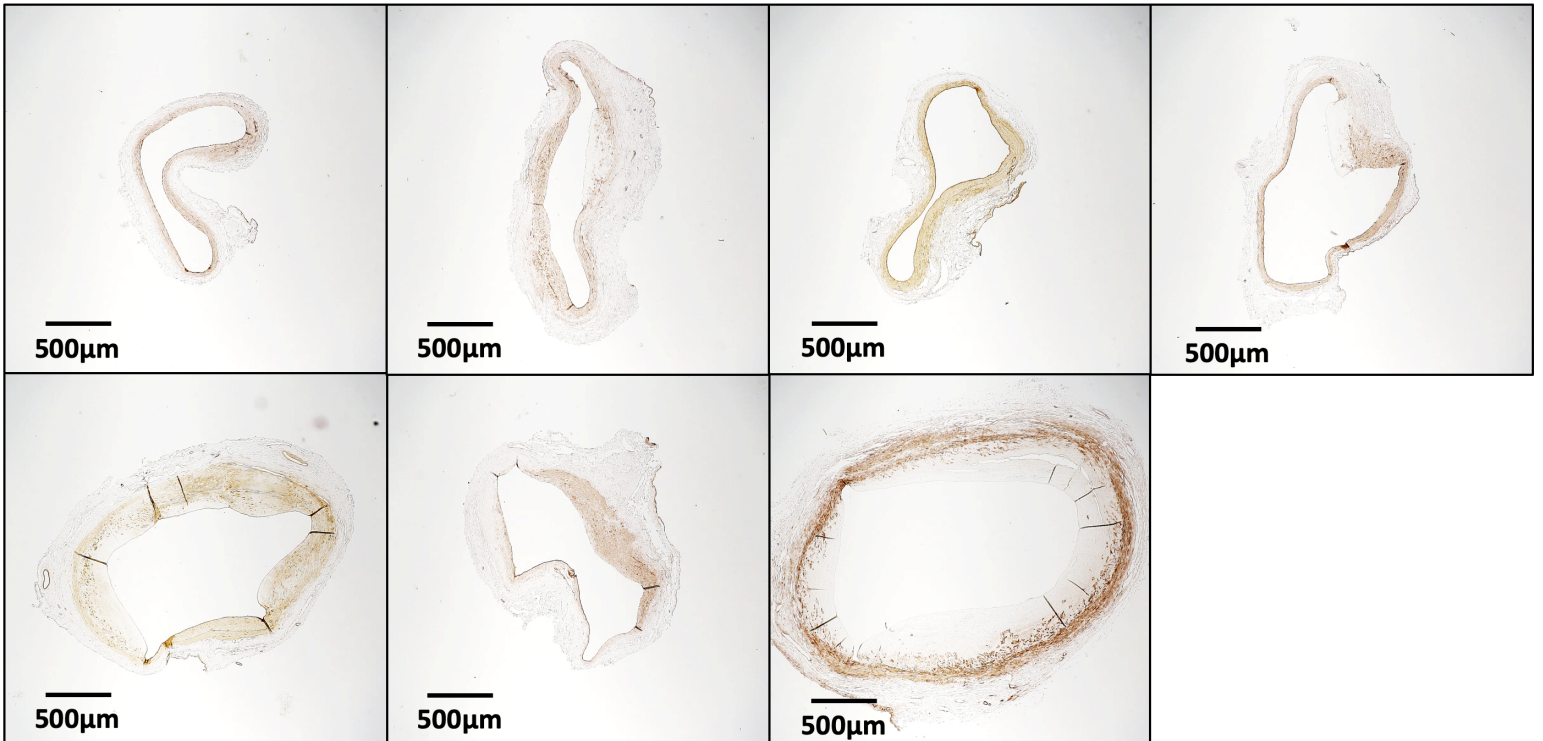

**Supplementary Figure S6.** Immunostaining of  $\alpha$ -SMA in abdominal aorta cross sections. A, Saline/sham group. B, Vinpocetine/sham group. C, Saline/elastase group. D, Vinpocetine/elastase group. Three sections at 300  $\mu$ m intervals from aneurysmal center segment (segment of largest diameter) of each animal were included in quantification. Representative images from one level are shown here due to space limitation.



# Supplementary Figure S7

## A Saline/Sham

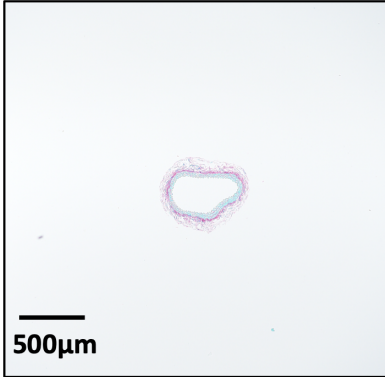

## C Saline/Elastase

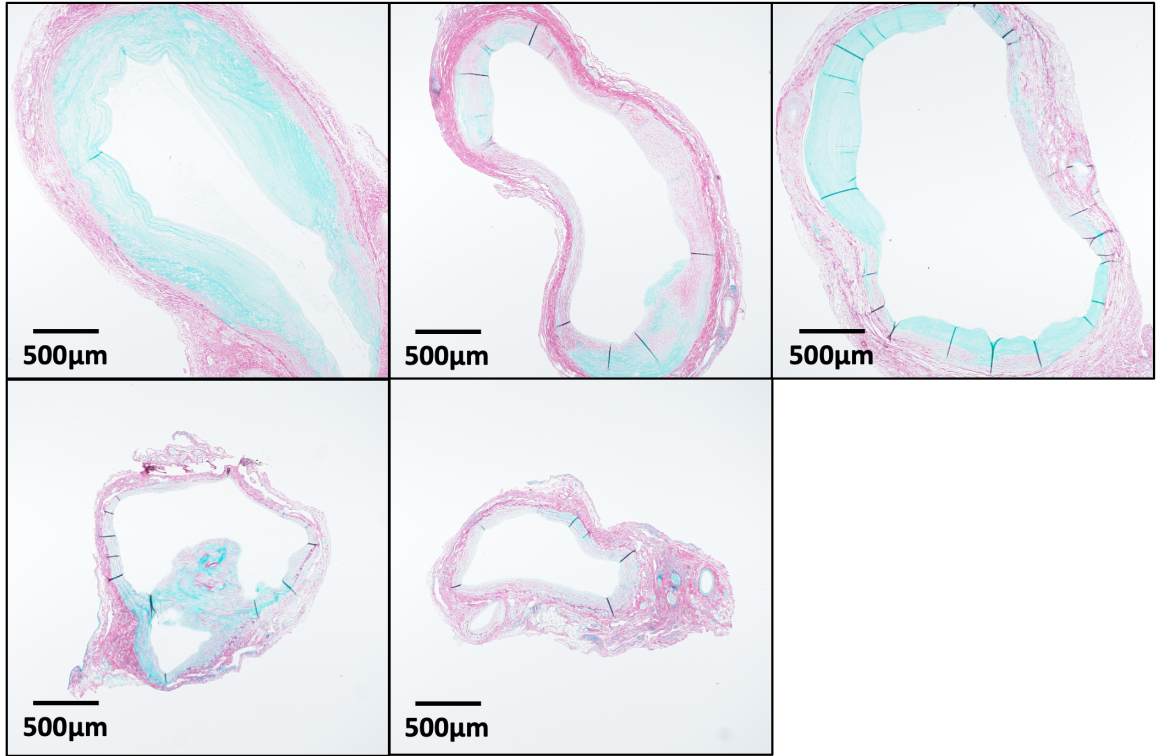

## B Vinpocetine/Sham

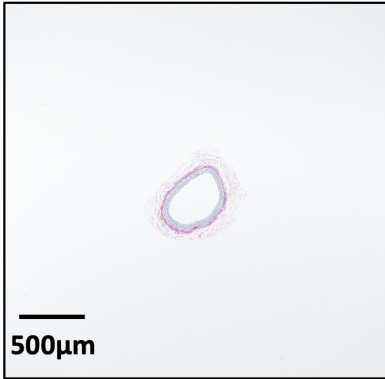

## D Vinpocetine/Elastase

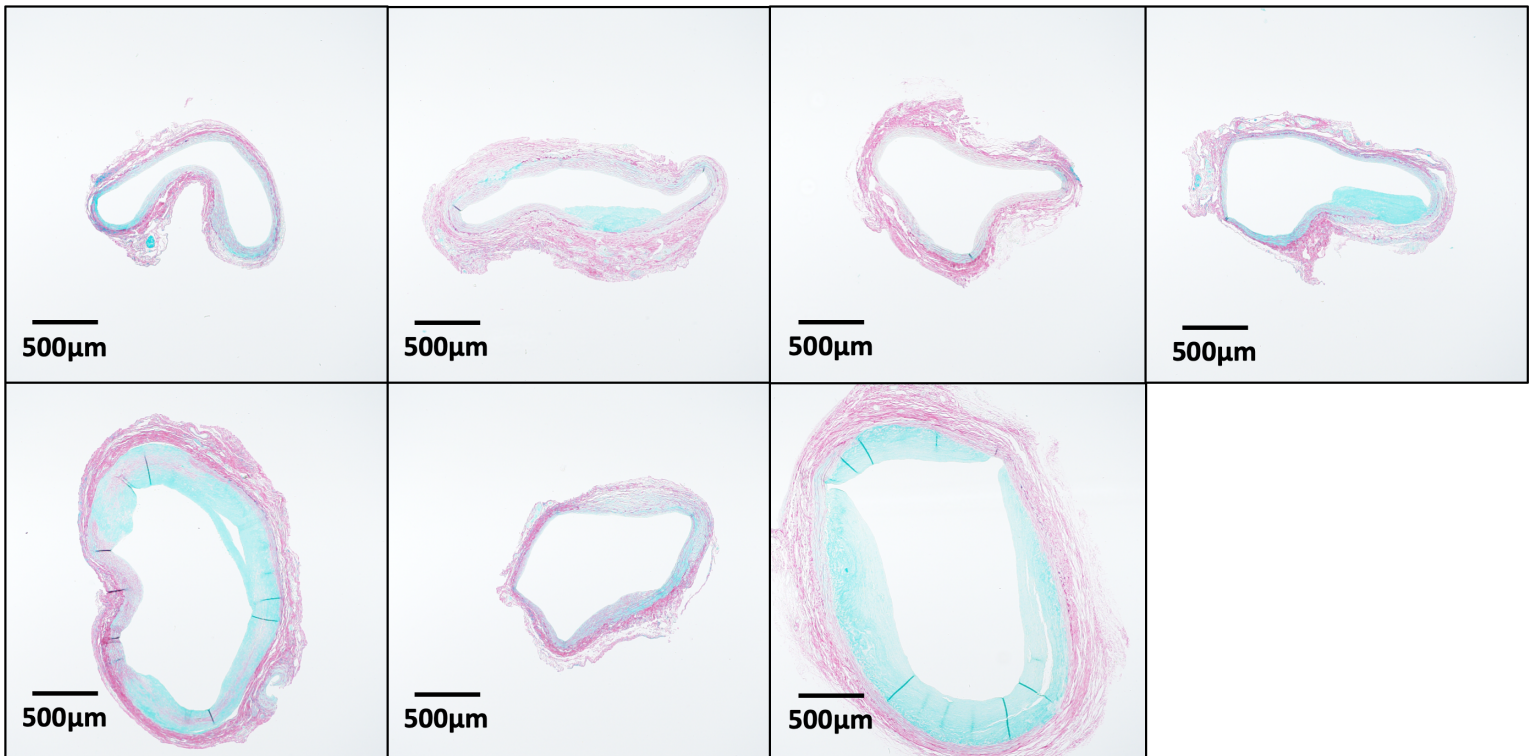

**Supplementary Figure S7.** Sirius red/Fast green staining of abdominal aorta cross sections. A, Saline/sham group. B, Vinpocetine/sham group. C, Saline/elastase group. D, Vinpocetine/elastase group. The section from the level of the largest diameter of AAA for each animal was selected for staining.



# Supplementary Figure S8

## A Saline/Sham

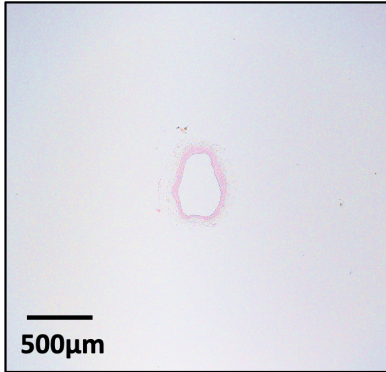

## B Vinpocetine/Sham

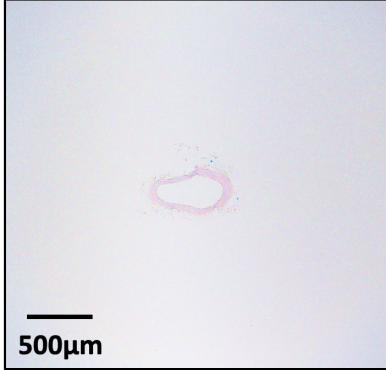

## C Saline/Elastase

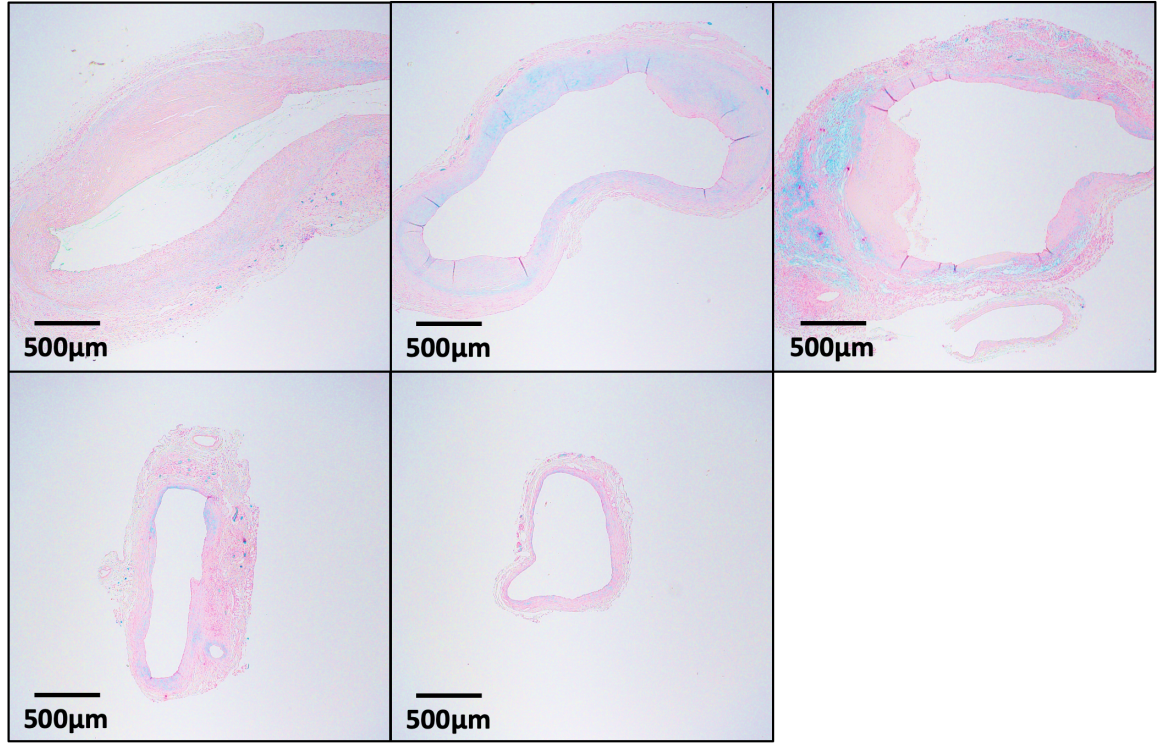

## D Vinpocetine/Elastase

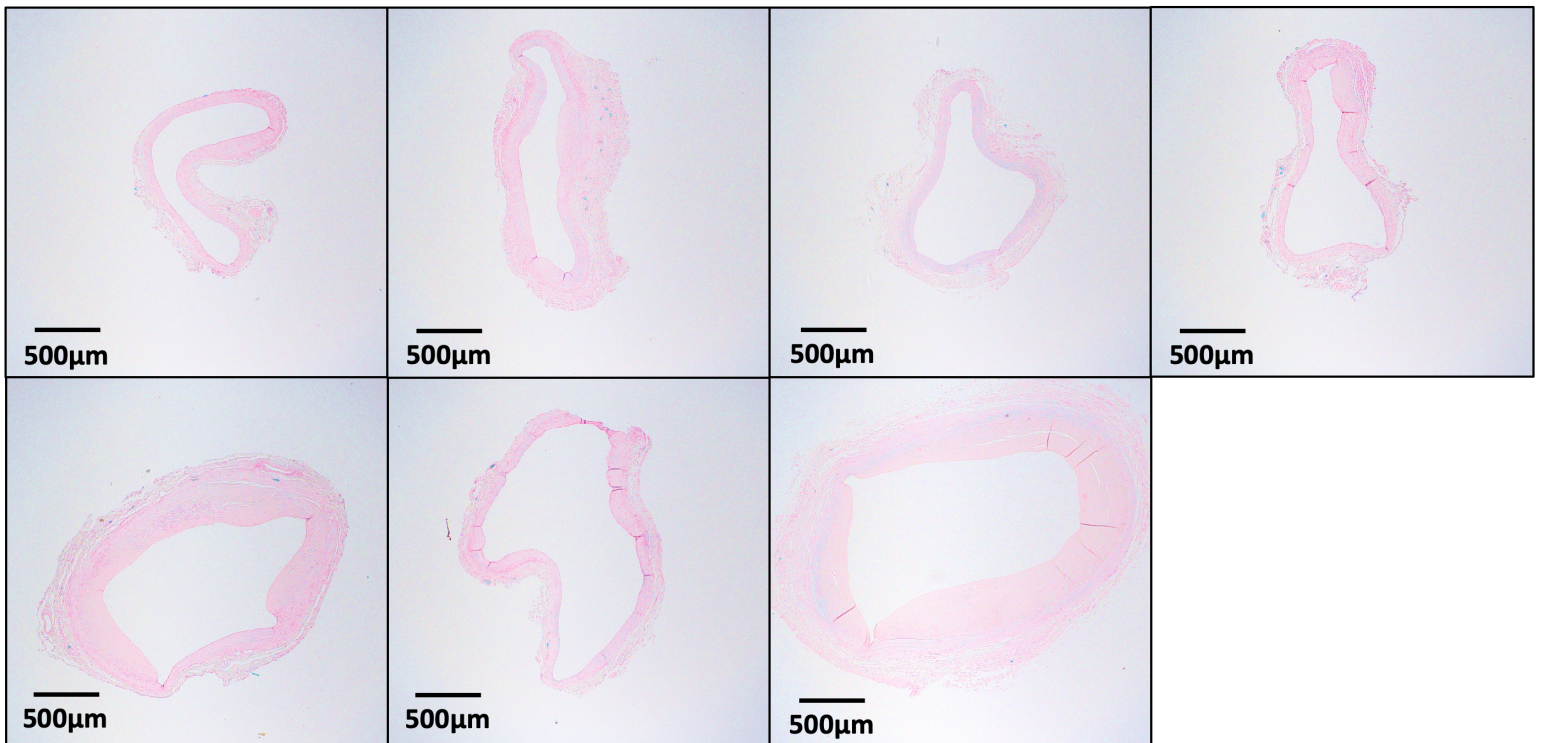

**Supplementary Figure S8.** Alcian blue staining of abdominal aorta cross sections. A, Saline/sham group. B, Vinpocetine/sham group. C, Saline/elastase group. D, Vinpocetine/elastase group. Three sections at 300  $\mu\text{m}$  intervals from aneurysmal center segment (segment of largest diameter) of each animal were included in quantification. Representative images from one level are shown here due to space limitation.



# Supplementary Figure S9

## Negative control of F4/80 immunohistochemistry

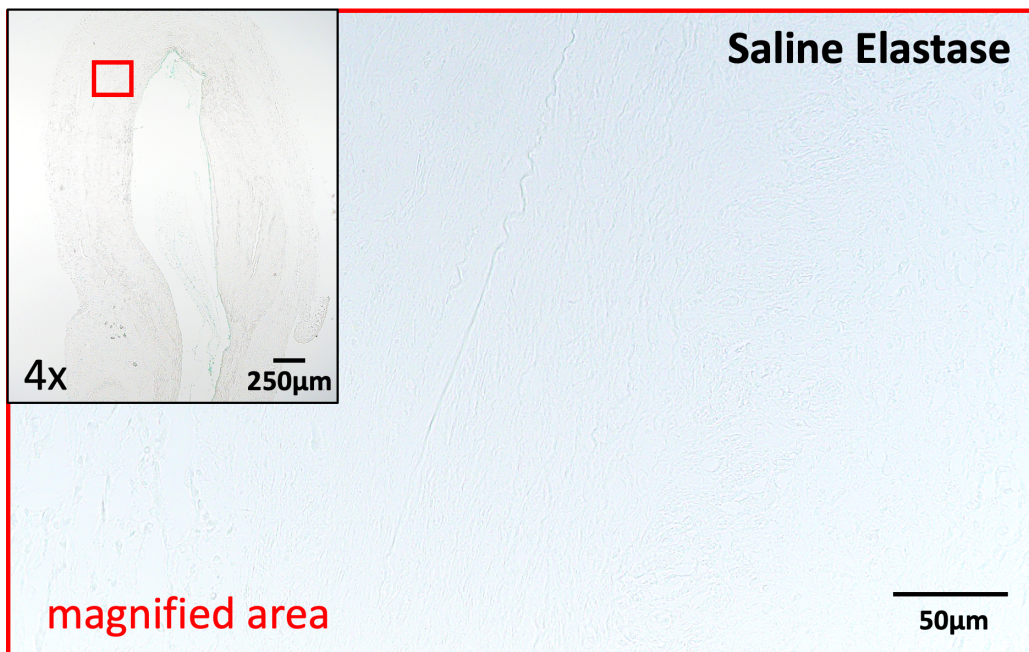

**Supplementary Figure S9.** Negative control of F4/80 immunohistochemistry staining in adjacent section of saline elastase induced-AAA used in Fig. 5A (lower left panel). The inset is the 4x image of the whole section. Image outlined red is the magnification of the area highlighted in red box in inset. The magnification shows the same area as Fig. 5A. Negative controls were imaged using same acquisition parameters as Fig. 5A.

# Supplementary Figure S10

## A Saline/Sham

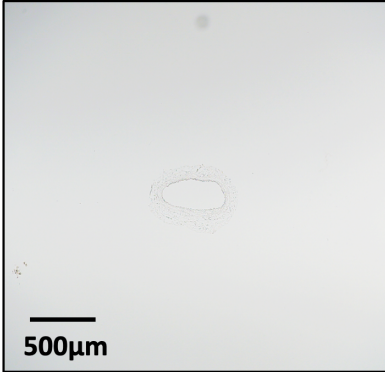

## B Vinpocetine/Sham

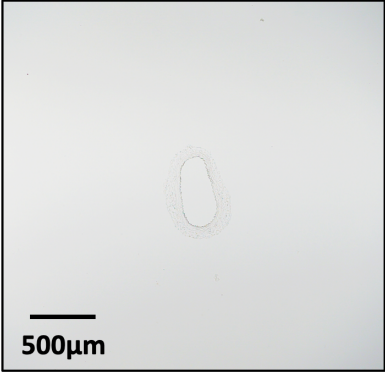

## C Saline/Elastase

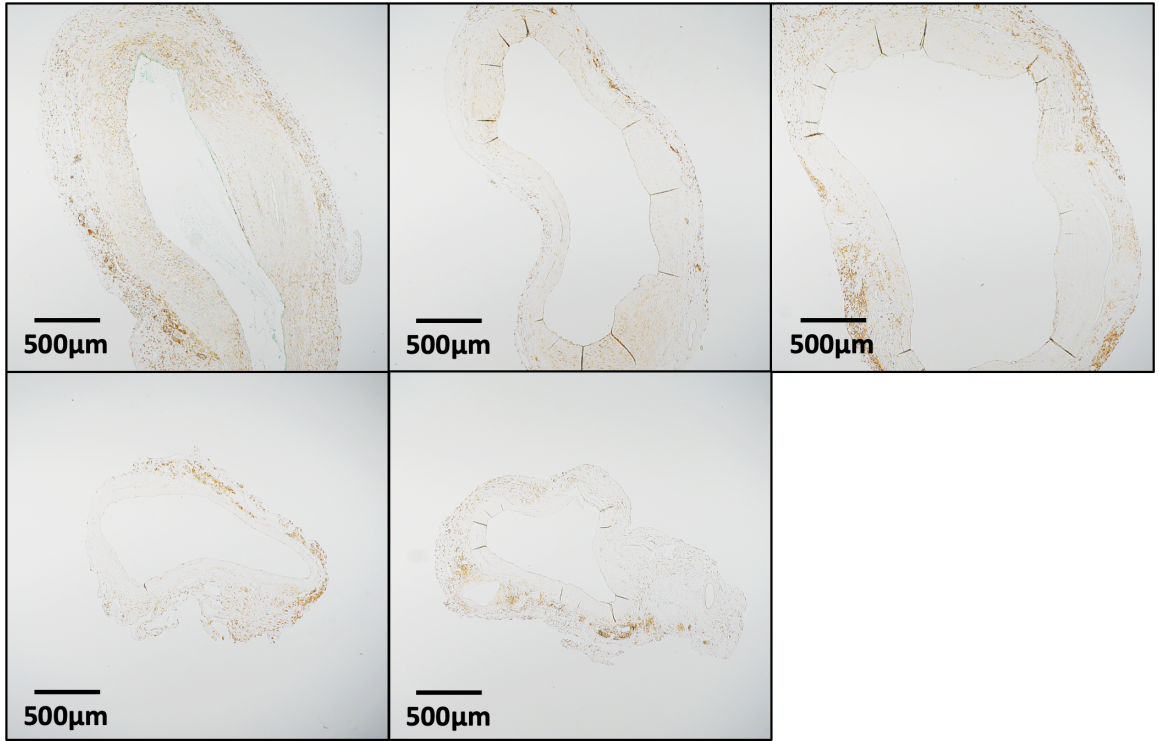

## D Vinpocetine/Elastase

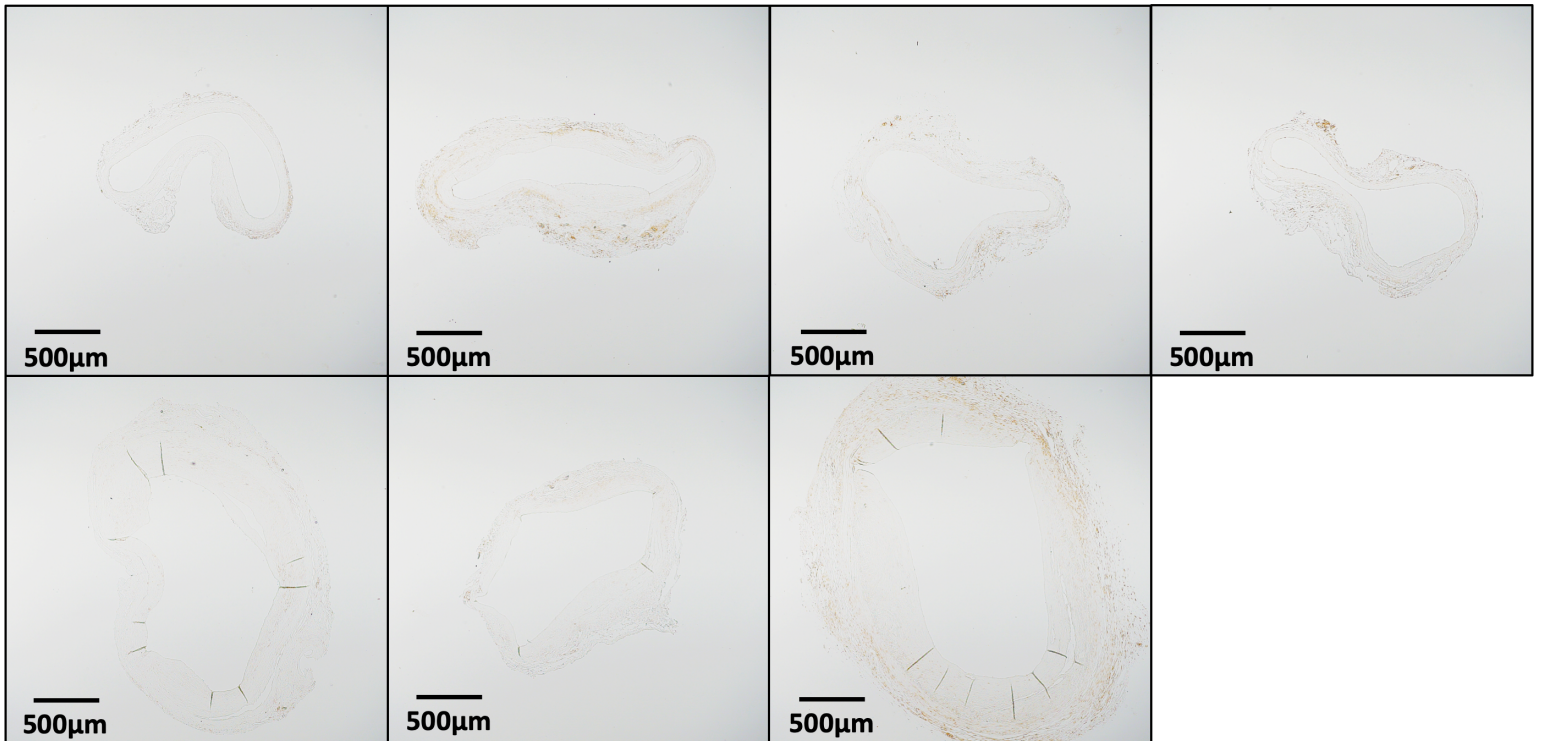

**Supplementary Figure S10.** Immunostaining of F4/80 in abdominal aorta cross sections. A, Saline/sham group. B, Vinpocetine/sham group. C, Saline/elastase group. D, Vinpocetine/elastase group. Three sections at 300  $\mu\text{m}$  intervals from aneurysmal center segment (segment of largest diameter) of each animal were included in quantification. Representative images from one level are shown here due to space limitation.

# Supplementary Figure S11

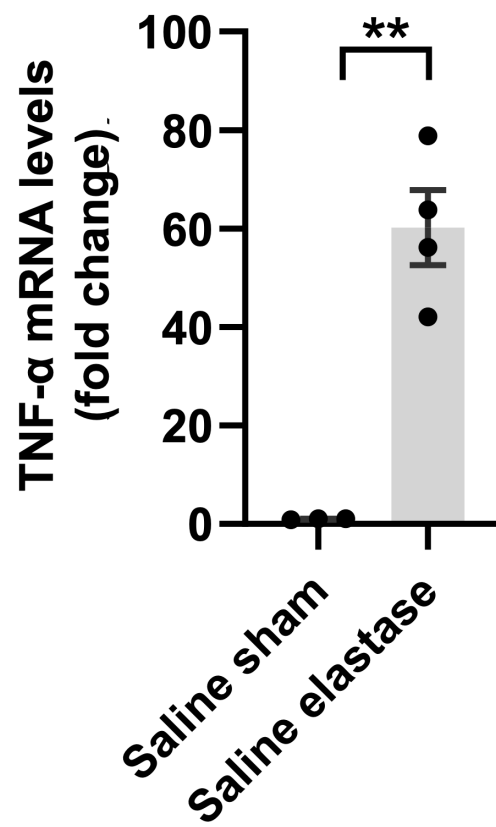

**Supplementary Figure S11.** TNF $\alpha$  mRNA level in infrarenal aortas of mice. 13-week-old wild type C57BL/6 male mice were treated with 0.2% BAPN in drinking water that started from 2 days before surgery. Mice were given either sham (n=3) or perivascular elastase surgery (n=4), and infrarenal aortas were collected on the 7th day post-surgery. TNF $\alpha$  mRNA levels in the samples were assessed by real time PCR and normalized to saline sham, shown as fold change. Statistics were performed with Parametric Welch's t-test. Data are mean  $\pm$  SEM. \*\*P < 0.01.



# Supplementary Figure S12

## Negative control of p65 immunocytochemistry

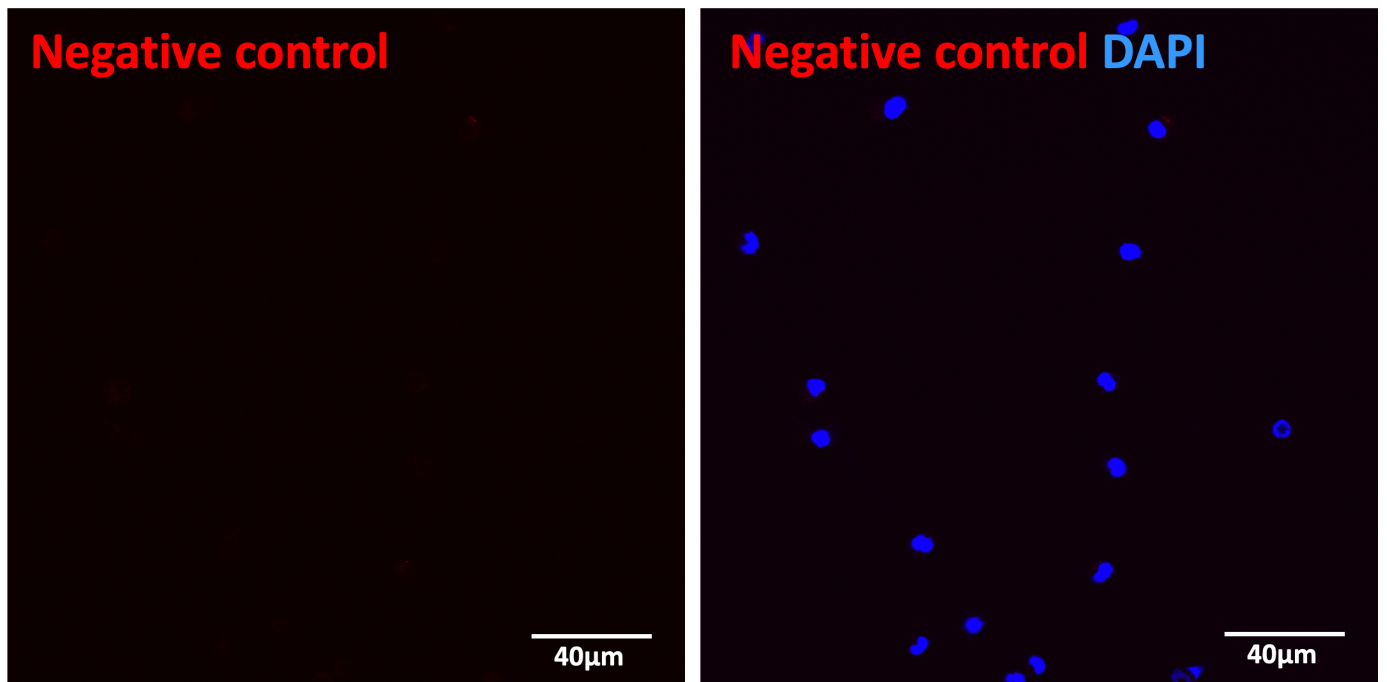

**Supplementary Figure S12.** Negative control of p65 immunocytochemistry staining in macrophages. The left panel is negative control without DAPI, the right panel shows negative control image merged with DAPI. Negative controls were imaged using same acquisition parameters as Fig. 6A.



# Supplementary Figure S13

**A**

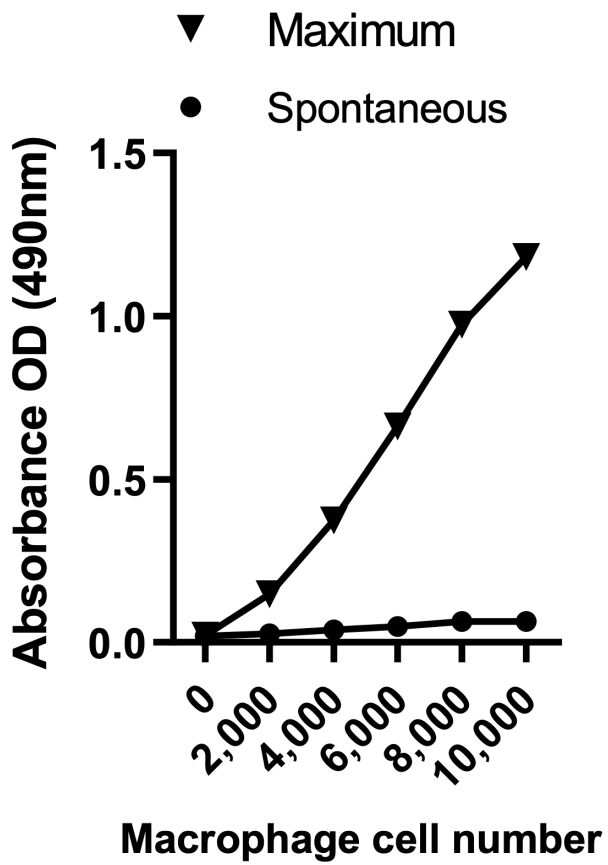

**B**

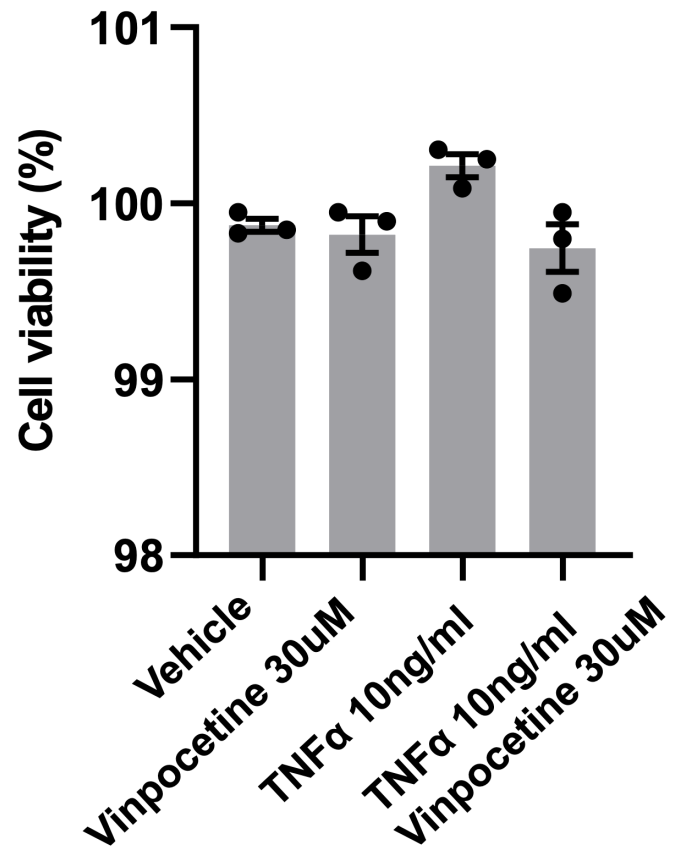

**Supplementary Figure S13.** Macrophage cytotoxicity evaluated by lactate dehydrogenase (LDH)-releasing assay. A, Absorbance versus macrophage cell number to determine optimum cell number to use for LDH cytotoxicity assay according to manufacturer's instructions. Primary mouse resident peritoneal macrophages were isolated and seeded in a serial dilution in two sets. One set of 0-10,000 macrophages series was used to determine the Spontaneous LDH Release. Another set 0-10,000 cells series was used to determine the Maximum LDH release. The Maximum LDH Release absorbance and Spontaneous LDH Release absorbance were plotted versus macrophage cell number. The greatest difference of absorbance between the Spontaneous and Maximum determined the optimal cell number to use in cytotoxicity experiments in panel B. B, Effects of vinpocetine and/or TNF $\alpha$  on macrophage viability. 10,000 macrophages in triplicate wells in a 96-well tissue culture plate were used for experimental groups (Vehicle control, Vinpocetine, TNF $\alpha$ , TNF $\alpha$  and Vinpocetine), Spontaneous LDH Activity group and Maximum LDH Activity group. Cells of experimental groups were starved in serum free RPMI1640 medium for 4 hours, followed by pretreatment with 30uM vinpocetine for 60min before treatment with or without murine TNF- $\alpha$  (10ng/ml) for 6 hours in the continued presence or absence of vinpocetine (30uM). Data were from 3 experiments.

# Supplementary Figure S14

## Negative control of p65 immunohistochemistry

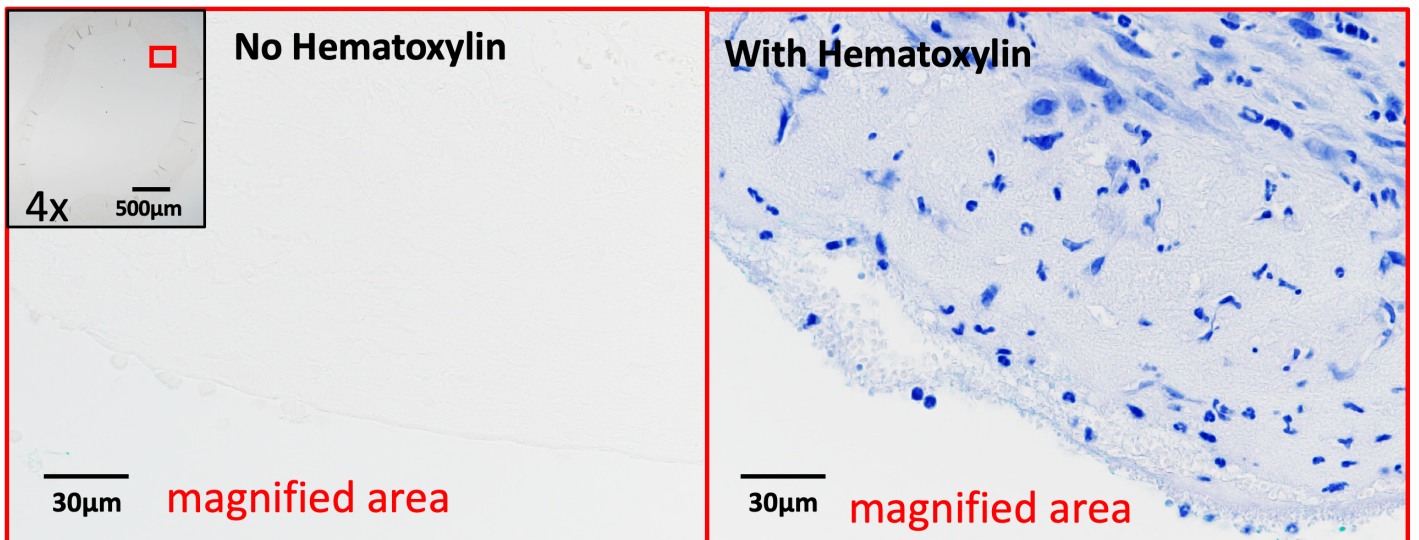

**Supplementary Figure S14.** Negative control of p65 immunostaining in tissue sections. A, negative control of p65 immunohistochemistry staining in adjacent sections of saline elastase induced-AAA used in Fig. 6E (lower left panel). The inset is the 4x image of the whole section without hematoxylin counterstain. Image outlined red is the magnification of the area highlighted in red box in inset. The magnification shows the same area as Fig. 6E. The left panel is negative control without hematoxylin counterstain, the right panel is negative control with hematoxylin counterstain.

# Supplementary Figure S15

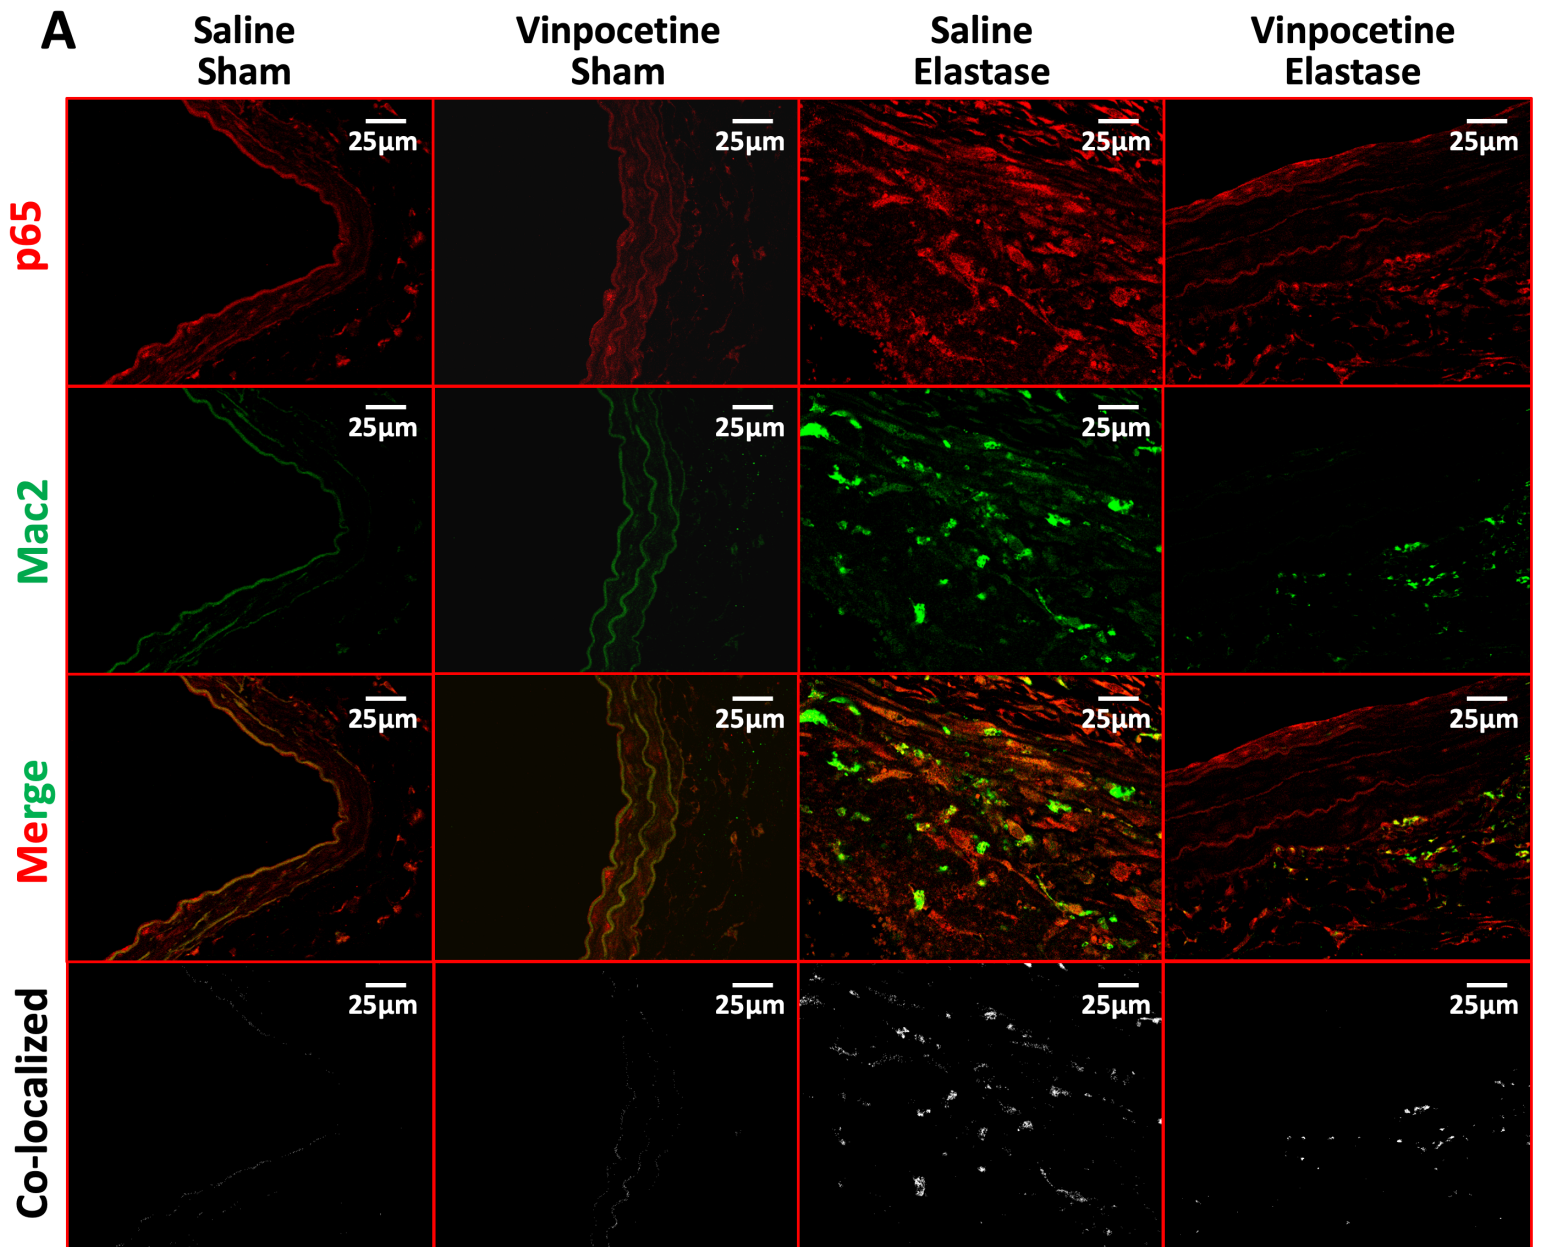

**B** Negative control of p65 and Mac2 immunofluorescence

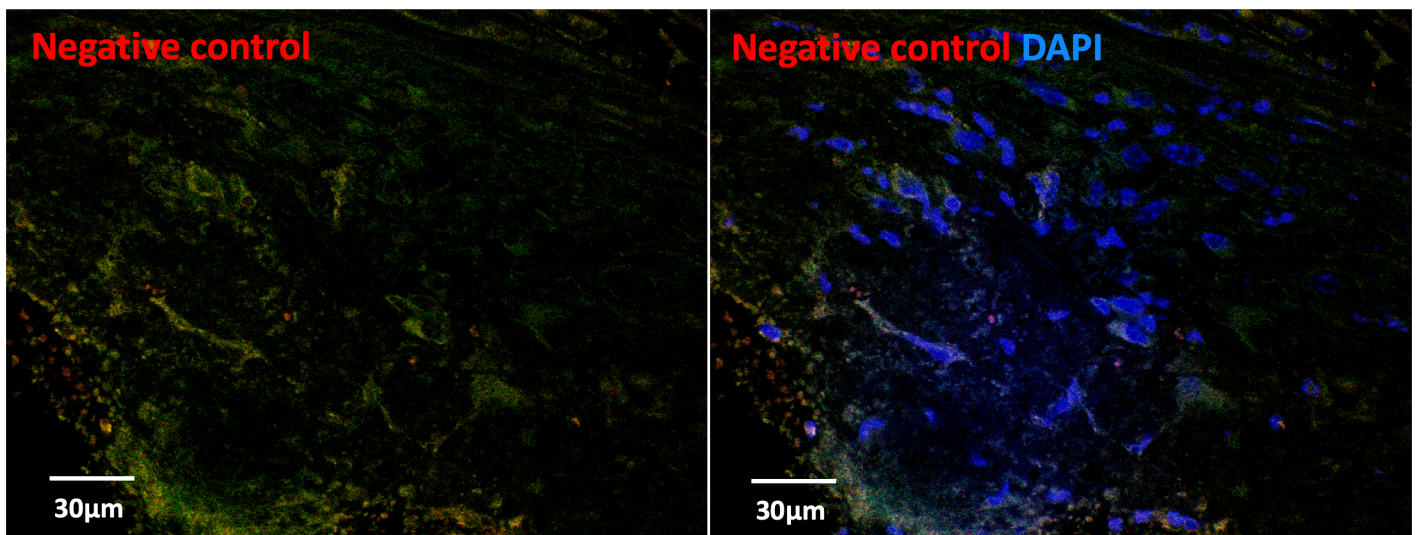

**Supplementary Figure S15.** Double immunofluorescence staining of p65 and Mac2 on abdominal aortic cross sections from saline/sham, vinpocetine/sham, saline/elastase, vinpocetine/elastase samples. A, Immunostaining of sections from the same level used for p65 immunohistochemistry (Fig. 6E) are shown (same area). The first three row show p65, Mac2 and merged images. The fourth row shows colocalized points in white by colocalization analysis. B, Negative control of p65 and Mac2 immunostaining in saline elastase section (same area as panel A). The left panel is negative control without DAPI, the right panel shows negative control image merged with DAPI. Negative controls were imaged using same acquisition parameters as panel A.
